# Supplementary material for: A QSPR study on the liquid crystallinity of five-ring bent-core molecules using decision trees, MARS and artificial neural networks
Source: Royal Society of Chemistry journal article supplement (doi:10.1039/c5ra20775d), 2016-01-01
Supplement: c5ra20775d1.pdf [file c5ra20775d1.pdf]

*Supporting Information*

**A QSPR study on liquid crystallinity of five-ring bent-core molecules using  
decision trees, MARS and artificial neural networks**

Jelena Antanasijević,<sup>\*,#</sup> Davor Antanasijević,<sup>‡</sup> Viktor Pocajt,<sup>#</sup> Nemanja Trišović,<sup>#</sup>  
and Katalin Fodor-Csorba<sup>§</sup>

<sup>#</sup> *University of Belgrade, Faculty of Technology and Metallurgy, Karnegijeva 4, 11120  
Belgrade, Serbia*

<sup>‡</sup> *University of Belgrade, Innovation Center of the Faculty of Technology and Metallurgy,  
Karnegijeva 4, 11120 Belgrade, Serbia*

<sup>§</sup> *Wigner Research Centre for Physics, Institute for Solid State Physics and Optics of the  
Hungarian Academy of Sciences, H-1525 Budapest, P.O. Box 49, Hungary*

\*Corresponding author e-mail: jantanasijevic@tmf.bg.ac.rs

## Supporting Information

Table S1. Molecular structure and liquid crystal behavior of the modelled compounds

| Comp. | Molecular structure                 | LC/NLC | Ref. |
|-------|-------------------------------------|--------|------|
|       |                                     |        |      |
| 1     | R = C <sub>6</sub> H <sub>13</sub>  | LC     | 1    |
| 2     | R = C <sub>8</sub> H <sub>17</sub>  | LC     | 1    |
| 3     | R = C <sub>10</sub> H <sub>21</sub> | LC     | 1    |
| 4     | R = C <sub>12</sub> H <sub>25</sub> | LC     | 1    |
|       |                                     |        |      |
| 5     | R = C <sub>4</sub> H <sub>9</sub>   | LC     | 2    |
| 6     | R = C <sub>5</sub> H <sub>11</sub>  | LC     | 2    |
| 7*    | R = C <sub>6</sub> H <sub>13</sub>  | LC     | 2    |
| 8*    | R = C <sub>7</sub> H <sub>15</sub>  | LC     | 2    |
| 9     | R = C <sub>8</sub> H <sub>17</sub>  | LC     | 2    |
| 10    | R = C <sub>9</sub> H <sub>19</sub>  | LC     | 2    |
| 11    | R = C <sub>10</sub> H <sub>21</sub> | LC     | 2    |
| 12    | R = C <sub>11</sub> H <sub>23</sub> | LC     | 2    |
| 13    | R = C <sub>12</sub> H <sub>25</sub> | LC     | 2    |
| 14*   | R = C <sub>14</sub> H <sub>29</sub> | LC     | 2    |
| 15    | R = C <sub>16</sub> H <sub>33</sub> | LC     | 2    |
|       |                                     |        |      |
| 16    | R = C <sub>4</sub> H <sub>9</sub>   | LC     | 2    |
| 17*   | R = C <sub>5</sub> H <sub>11</sub>  | LC     | 2    |
| 18    | R = C <sub>6</sub> H <sub>13</sub>  | LC     | 2    |
| 19    | R = C <sub>7</sub> H <sub>15</sub>  | LC     | 2    |
| 20    | R = C <sub>8</sub> H <sub>17</sub>  | LC     | 2    |
| 21    | R = C <sub>9</sub> H <sub>19</sub>  | LC     | 2    |
| 22    | R = C <sub>10</sub> H <sub>21</sub> | LC     | 2    |
| 23    | R = C <sub>11</sub> H <sub>23</sub> | LC     | 2    |
| 24    | R = C <sub>12</sub> H <sub>25</sub> | LC     | 2    |

# Supporting Information

|     |                                     |     |   |
|-----|-------------------------------------|-----|---|
|     |                                     |     |   |
| 25  | R = C <sub>8</sub> H <sub>17</sub>  | NLC | 2 |
| 26  | R = C <sub>9</sub> H <sub>19</sub>  | LC  | 2 |
| 27  | R = C <sub>10</sub> H <sub>21</sub> | LC  | 2 |
| 28  | R = C <sub>11</sub> H <sub>23</sub> | LC  | 2 |
| 29  | R = C <sub>12</sub> H <sub>25</sub> | LC  | 2 |
|     |                                     |     |   |
| 30  | R = C <sub>5</sub> H <sub>11</sub>  | NLC | 2 |
| 31  | R = C <sub>6</sub> H <sub>13</sub>  | LC  | 2 |
| 32  | R = C <sub>7</sub> H <sub>15</sub>  | LC  | 2 |
| 33* | R = C <sub>8</sub> H <sub>17</sub>  | LC  | 2 |
| 34  | R = C <sub>9</sub> H <sub>19</sub>  | LC  | 2 |
| 35  | R = C <sub>10</sub> H <sub>21</sub> | LC  | 2 |
| 36  | R = C <sub>11</sub> H <sub>23</sub> | LC  | 2 |
| 37  | R = C <sub>12</sub> H <sub>25</sub> | LC  | 2 |
| 38  | R = C <sub>14</sub> H <sub>29</sub> | LC  | 2 |
| 39  | R = C <sub>16</sub> H <sub>33</sub> | LC  | 2 |
|     |                                     |     |   |
| 40  | R = C <sub>4</sub> H <sub>9</sub>   | LC  | 2 |
| 41  | R = C <sub>6</sub> H <sub>13</sub>  | LC  | 2 |
| 42  | R = C <sub>8</sub> H <sub>17</sub>  | LC  | 2 |
| 43* | R = C <sub>10</sub> H <sub>21</sub> | LC  | 2 |
| 44  | R = C <sub>12</sub> H <sub>25</sub> | LC  | 2 |
|     |                                     |     |   |
| 45  | R = C <sub>12</sub> H <sub>25</sub> | NLC | 2 |
| 46  | R = C <sub>14</sub> H <sub>29</sub> | LC  | 2 |
| 47  | R = C <sub>16</sub> H <sub>33</sub> | LC  | 2 |
| 48  | R = C <sub>18</sub> H <sub>37</sub> | LC  | 2 |

# Supporting Information

|     |                                                                                      |     |   |
|-----|--------------------------------------------------------------------------------------|-----|---|
| 49  | 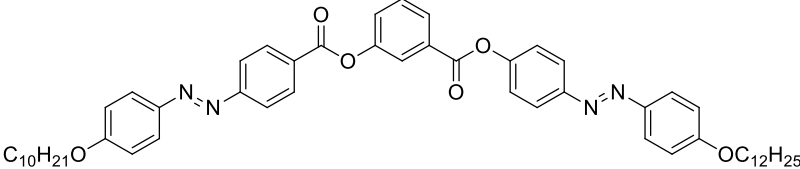   | NLC | 2 |
| 50  |    | NLC | 2 |
| 51  |    | NLC | 2 |
| 52* |    | NLC | 2 |
| 53  |   | NLC | 2 |
|     |  |     |   |
| 54  | R = C <sub>6</sub> H <sub>13</sub>                                                   | LC  | 3 |
| 55  | R = C <sub>8</sub> H <sub>17</sub>                                                   | LC  | 3 |
| 56  | R = C <sub>10</sub> H <sub>21</sub>                                                  | LC  | 3 |
| 57  | R = C <sub>12</sub> H <sub>25</sub>                                                  | LC  | 3 |
|     |  |     |   |
| 58* | R = C <sub>6</sub> H <sub>13</sub>                                                   | LC  | 4 |
| 59* | R = C <sub>8</sub> H <sub>17</sub>                                                   | LC  | 4 |
| 60  | R = C <sub>9</sub> H <sub>19</sub>                                                   | LC  | 4 |
| 61  | R = C <sub>10</sub> H <sub>21</sub>                                                  | LC  | 4 |
| 62  | R = C <sub>12</sub> H <sub>25</sub>                                                  | LC  | 4 |
| 63  | R = C <sub>14</sub> H <sub>29</sub>                                                  | LC  | 4 |
| 64  | R = C <sub>16</sub> H <sub>33</sub>                                                  | LC  | 4 |
| 65  | R = C <sub>18</sub> H <sub>37</sub>                                                  | LC  | 4 |
| 66  | R = C <sub>20</sub> H <sub>41</sub>                                                  | LC  | 4 |

# Supporting Information

|     |                    |     |   |
|-----|--------------------|-----|---|
| 67  | $R = C_{22}H_{45}$ | NLC | 4 |
|     |                    |     |   |
| 68  | $R = C_6H_{13}$    | LC  | 4 |
| 69  | $R = C_{14}H_{29}$ | LC  | 4 |
| 70  | $R = C_{20}H_{41}$ | LC  | 4 |
| 71  |                    | NLC | 4 |
| 72  |                    | LC  | 4 |
|     |                    |     |   |
| 73  | $X = H, Y = H$     | LC  | 5 |
| 74* | $X = H, Y = Cl$    | LC  | 5 |
| 75  | $X = H, Y = COOH$  | NLC | 5 |
| 76  | $X = F, Y = H$     | LC  | 5 |
| 77  | $X = F, Y = Cl$    | LC  | 5 |
| 78  | $X = F, Y = COOH$  | NLC | 5 |
|     |                    |     |   |
| 79  | $R = C_8H_{17}$    | LC  | 6 |
| 80  | $R = C_{10}H_{21}$ | LC  | 6 |
| 81  | $R = C_{12}H_{25}$ | LC  | 6 |
| 82* | $R = C_{14}H_{29}$ | LC  | 6 |
| 83  | $R = C_{16}H_{33}$ | LC  | 6 |
|     |                    |     |   |
| 84  | $R = C_8H_{17}$    | LC  | 6 |
| 85* | $R = C_{10}H_{21}$ | LC  | 6 |

# Supporting Information

|      |                    |     |   |
|------|--------------------|-----|---|
| 86   | $R = C_{12}H_{25}$ | LC  | 6 |
| 87   | $R = C_{14}H_{29}$ | LC  | 6 |
| 88   | $R = C_{16}H_{33}$ | LC  | 6 |
|      |                    |     |   |
| 89   | $R = C_8H_{17}$    | NLC | 6 |
| 90   | $R = C_{10}H_{21}$ | NLC | 6 |
| 91   | $R = C_{12}H_{25}$ | NLC | 6 |
| 92*  | $R = C_{14}H_{29}$ | NLC | 6 |
| 93   | $R = C_{16}H_{33}$ | LC  | 6 |
|      |                    |     |   |
| 94   | $R = C_4H_9$       | NLC | 7 |
| 95*  | $R = C_6H_{13}$    | LC  | 7 |
| 96   | $R = C_8H_{17}$    | LC  | 7 |
| 97   | $R = C_{10}H_{21}$ | LC  | 7 |
| 98   | $R = C_{12}H_{25}$ | LC  | 7 |
| 99   | $R = C_{14}H_{29}$ | LC  | 7 |
| 100* | $R = C_{16}H_{33}$ | LC  | 7 |
| 101  | $R = C_{18}H_{37}$ | NLC | 7 |
| 102  |                    | LC  | 7 |
| 103  |                    | NLC | 7 |
| 104  |                    | LC  | 7 |
| 105  |                    | LC  | 7 |

# Supporting Information

|      |                                                                                        |     |    |
|------|----------------------------------------------------------------------------------------|-----|----|
| 106  |                                                                                        | LC  | 7  |
|      |                                                                                        |     |    |
| 107  | R = C <sub>8</sub> H <sub>17</sub>                                                     | LC  | 8  |
| 108  | R = C <sub>10</sub> H <sub>21</sub>                                                    | LC  | 8  |
| 109  | R = C <sub>12</sub> H <sub>25</sub>                                                    | LC  | 8  |
| 110  | R = C <sub>14</sub> H <sub>29</sub>                                                    | LC  | 8  |
| 111* | R = C <sub>16</sub> H <sub>33</sub>                                                    | LC  | 8  |
| 112  | R = C <sub>18</sub> H <sub>37</sub>                                                    | LC  | 8  |
| 113  |                                                                                        | NLC | 9  |
|      |                                                                                        |     |    |
| 114  | R = C <sub>8</sub> H <sub>17</sub>                                                     | LC  | 9  |
| 115  | R = C <sub>10</sub> H <sub>21</sub>                                                    | LC  | 9  |
| 116  | R = C <sub>12</sub> H <sub>25</sub>                                                    | LC  | 9  |
| 117  | R = C <sub>14</sub> H <sub>29</sub>                                                    | LC  | 9  |
|      |                                                                                        |     |    |
| 118  | R = C <sub>12</sub> H <sub>25</sub> ; R <sub>1</sub> = C <sub>14</sub> H <sub>29</sub> | NLC | 10 |
| 119  | R = C <sub>12</sub> H <sub>25</sub> ; R <sub>1</sub> = C <sub>16</sub> H <sub>33</sub> | LC  | 10 |
| 120  | R = C <sub>16</sub> H <sub>33</sub> ; R <sub>1</sub> = C <sub>12</sub> H <sub>25</sub> | LC  | 10 |
| 121  | R = C <sub>16</sub> H <sub>33</sub> ; R <sub>1</sub> = C <sub>16</sub> H <sub>33</sub> | LC  | 10 |
|      |                                                                                        |     |    |
| 122  | R = C <sub>4</sub> H <sub>9</sub>                                                      | NLC | 10 |
| 123* | R = C <sub>5</sub> H <sub>11</sub>                                                     | LC  | 10 |
| 124  | R = C <sub>6</sub> H <sub>13</sub>                                                     | LC  | 10 |

# Supporting Information

|      |                                                                                      |     |    |
|------|--------------------------------------------------------------------------------------|-----|----|
| 125  | $R = C_7H_{15}$                                                                      | LC  | 10 |
| 126  | $R = C_8H_{17}$                                                                      | LC  | 10 |
| 127  | $R = C_9H_{19}$                                                                      | LC  | 10 |
| 128* | $R = C_{10}H_{21}$                                                                   | NLC | 10 |
| 129  | $R = C_{11}H_{23}$                                                                   | LC  | 10 |
| 130  | $R = C_{12}H_{25}$                                                                   | LC  | 10 |
| 131  | $R = C_{14}H_{29}$                                                                   | LC  | 10 |
| 132  | $R = C_{16}H_{33}$                                                                   | LC  | 10 |
|      | 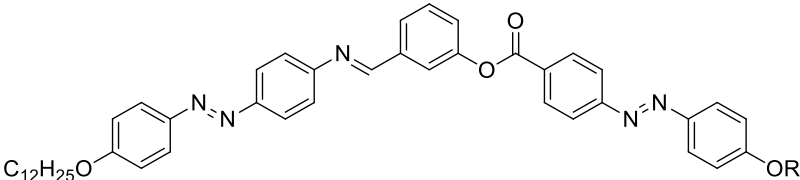   |     |    |
| 133  | $R = C_4H_9$                                                                         | LC  | 11 |
| 134  | $R = C_5H_{11}$                                                                      | LC  | 11 |
| 135  | $R = C_6H_{13}$                                                                      | LC  | 11 |
| 136  | $R = C_7H_{15}$                                                                      | LC  | 11 |
| 137  | $R = C_8H_{17}$                                                                      | LC  | 11 |
| 138* | $R = C_9H_{19}$                                                                      | LC  | 11 |
| 139* | $R = C_{10}H_{21}$                                                                   | LC  | 11 |
| 140* | $R = C_{11}H_{23}$                                                                   | LC  | 11 |
| 141  | $R = C_{12}H_{25}$                                                                   | LC  | 11 |
| 142  | $R = C_{14}H_{29}$                                                                   | LC  | 11 |
| 143  | $R = C_{16}H_{33}$                                                                   | LC  | 11 |
|      |  |     |    |
| 144  | $R = C_4H_9$                                                                         | LC  | 11 |
| 145* | $R = C_5H_{11}$                                                                      | LC  | 11 |
| 146  | $R = C_6H_{13}$                                                                      | LC  | 11 |
| 147  | $R = C_7H_{15}$                                                                      | LC  | 11 |
| 148  | $R = C_8H_{17}$                                                                      | LC  | 11 |
| 149  | $R = C_9H_{19}$                                                                      | LC  | 11 |
| 150  | $R = C_{10}H_{21}$                                                                   | LC  | 11 |
| 151  | $R = C_{11}H_{23}$                                                                   | LC  | 11 |
| 152  | $R = C_{12}H_{25}$                                                                   | LC  | 11 |
| 153  | $R = C_{14}H_{29}$                                                                   | LC  | 11 |
| 154  | $R = C_{16}H_{33}$                                                                   | LC  | 11 |
|      |  |     |    |
| 155  | $R = OC_4H_9$                                                                        | LC  | 12 |



# Supporting Information

|      |                                                                                      |     |    |
|------|--------------------------------------------------------------------------------------|-----|----|
| 156  | R = OC <sub>6</sub> H <sub>13</sub>                                                  | LC  | 12 |
| 157  | R = OC <sub>8</sub> H <sub>17</sub>                                                  | LC  | 12 |
| 158  | R = OC <sub>10</sub> H <sub>21</sub>                                                 | LC  | 12 |
| 159  | R = OC <sub>12</sub> H <sub>25</sub>                                                 | LC  | 12 |
| 160  | R = C <sub>4</sub> H <sub>9</sub>                                                    | LC  | 12 |
| 161  | R = C <sub>6</sub> H <sub>13</sub>                                                   | LC  | 12 |
| 162  | R = C <sub>8</sub> H <sub>17</sub>                                                   | LC  | 12 |
| 163  | R = C <sub>10</sub> H <sub>21</sub>                                                  | LC  | 12 |
| 164  | R = C <sub>12</sub> H <sub>25</sub>                                                  | LC  | 12 |
|      | 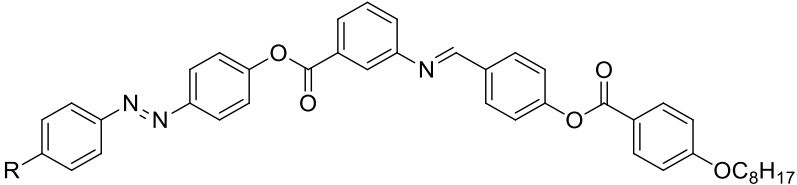   |     |    |
| 165  | R = C <sub>4</sub> H <sub>9</sub>                                                    | LC  | 13 |
| 166* | R = C <sub>6</sub> H <sub>13</sub>                                                   | LC  | 13 |
| 167  | R = C <sub>8</sub> H <sub>17</sub>                                                   | LC  | 13 |
| 168  | R = C <sub>10</sub> H <sub>21</sub>                                                  | LC  | 13 |
| 169  | R = C <sub>12</sub> H <sub>25</sub>                                                  | LC  | 13 |
| 170  | R = OC <sub>4</sub> H <sub>9</sub>                                                   | LC  | 13 |
| 171  | R = OC <sub>6</sub> H <sub>13</sub>                                                  | LC  | 13 |
| 172  | R = OC <sub>8</sub> H <sub>17</sub>                                                  | LC  | 13 |
| 173  | R = OC <sub>10</sub> H <sub>21</sub>                                                 | LC  | 13 |
| 174  | R = OC <sub>12</sub> H <sub>25</sub>                                                 | LC  | 13 |
|      |  |     |    |
| 175  | R = C <sub>6</sub> H <sub>13</sub>                                                   | NLC | 14 |
| 176  | R = C <sub>8</sub> H <sub>17</sub>                                                   | LC  | 14 |
| 177  | R = C <sub>10</sub> H <sub>21</sub>                                                  | LC  | 14 |
| 178  | R = C <sub>12</sub> H <sub>25</sub>                                                  | LC  | 14 |
|      |  |     |    |
| 179  | R = C <sub>8</sub> H <sub>17</sub>                                                   | LC  | 15 |
| 180  | R = C <sub>10</sub> H <sub>21</sub>                                                  | LC  | 15 |
| 181  | R = C <sub>12</sub> H <sub>25</sub>                                                  | LC  | 15 |
| 182* | R = C <sub>14</sub> H <sub>29</sub>                                                  | LC  | 15 |
| 183  | R = C <sub>16</sub> H <sub>33</sub>                                                  | LC  | 15 |

# Supporting Information

|      |                                      |     |    |
|------|--------------------------------------|-----|----|
| 184* |                                      | NLC | 15 |
| 185  |                                      | NLC | 15 |
| 186  |                                      | NLC | 15 |
| 187  |                                      | NLC | 15 |
| 188  |                                      | NLC | 15 |
|      |                                      |     |    |
| 189  | R = OC <sub>5</sub> H <sub>11</sub>  | LC  | 16 |
| 190  | R = OC <sub>6</sub> H <sub>13</sub>  | LC  | 16 |
| 191  | R = OC <sub>7</sub> H <sub>15</sub>  | LC  | 16 |
| 192  | R = OC <sub>8</sub> H <sub>17</sub>  | LC  | 16 |
| 193  | R = OC <sub>10</sub> H <sub>21</sub> | LC  | 16 |
| 194* | R = OC <sub>12</sub> H <sub>25</sub> | LC  | 16 |
| 195  | R = OC <sub>16</sub> H <sub>33</sub> | LC  | 16 |
| 196  | R = C <sub>5</sub> H <sub>11</sub>   | LC  | 16 |
| 197  | R = C <sub>6</sub> H <sub>13</sub>   | LC  | 16 |
| 198  | R = C <sub>8</sub> H <sub>17</sub>   | LC  | 16 |
| 199  | R = C <sub>10</sub> H <sub>21</sub>  | LC  | 16 |
| 200  | R = C <sub>12</sub> H <sub>25</sub>  | LC  | 16 |
| 201  | R = C <sub>14</sub> H <sub>29</sub>  | LC  | 16 |

# Supporting Information

|      |                                                                                      |     |    |
|------|--------------------------------------------------------------------------------------|-----|----|
|      | 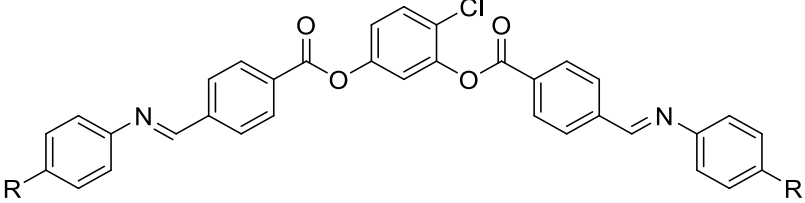   |     |    |
| 202  | R = OC <sub>6</sub> H <sub>13</sub>                                                  | NLC | 16 |
| 203  | R = OC <sub>7</sub> H <sub>15</sub>                                                  | LC  | 16 |
| 204  | R = OC <sub>8</sub> H <sub>17</sub>                                                  | LC  | 16 |
| 205* | R = OC <sub>9</sub> H <sub>19</sub>                                                  | LC  | 16 |
| 206  | R = OC <sub>10</sub> H <sub>21</sub>                                                 | LC  | 16 |
| 207  | R = OC <sub>12</sub> H <sub>25</sub>                                                 | LC  | 16 |
| 208* | R = C <sub>8</sub> H <sub>17</sub>                                                   | LC  | 16 |
| 209  | R = C <sub>10</sub> H <sub>21</sub>                                                  | LC  | 16 |
| 210  | R = C <sub>12</sub> H <sub>25</sub>                                                  | LC  | 16 |
| 211  | R = C <sub>14</sub> H <sub>29</sub>                                                  | LC  | 16 |
|      |   |     |    |
| 212* | R = OC <sub>6</sub> H <sub>13</sub>                                                  | LC  | 16 |
| 213  | R = OC <sub>7</sub> H <sub>15</sub>                                                  | LC  | 16 |
| 214  | R = OC <sub>8</sub> H <sub>17</sub>                                                  | LC  | 16 |
| 215  | R = OC <sub>9</sub> H <sub>19</sub>                                                  | LC  | 16 |
| 216  | R = OC <sub>10</sub> H <sub>21</sub>                                                 | LC  | 16 |
| 217  | R = OC <sub>12</sub> H <sub>25</sub>                                                 | LC  | 16 |
| 218  | R = C <sub>14</sub> H <sub>29</sub>                                                  | LC  | 16 |
|      |  |     |    |
| 219  | R = OC <sub>6</sub> H <sub>13</sub>                                                  | NLC | 16 |
| 220  | R = OC <sub>7</sub> H <sub>15</sub>                                                  | LC  | 16 |
| 221  | R = OC <sub>8</sub> H <sub>17</sub>                                                  | LC  | 16 |
| 222  | R = OC <sub>9</sub> H <sub>19</sub>                                                  | LC  | 16 |
| 223  | R = OC <sub>10</sub> H <sub>21</sub>                                                 | LC  | 16 |
| 224* | R = OC <sub>12</sub> H <sub>25</sub>                                                 | LC  | 16 |
|      |  |     |    |
| 225* | R = OC <sub>6</sub> H <sub>13</sub>                                                  | LC  | 16 |
| 226  | R = OC <sub>7</sub> H <sub>15</sub>                                                  | LC  | 16 |

# Supporting Information

|      |                                                                                      |     |    |
|------|--------------------------------------------------------------------------------------|-----|----|
| 227  | R = OC <sub>8</sub> H <sub>17</sub>                                                  | LC  | 16 |
| 228* | R = OC <sub>9</sub> H <sub>19</sub>                                                  | LC  | 16 |
| 229  | R = OC <sub>12</sub> H <sub>25</sub>                                                 | LC  | 16 |
| 230* | 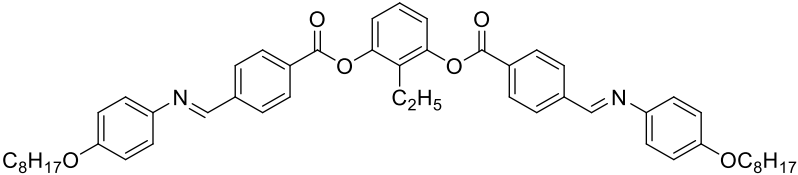   | NLC | 16 |
| 231  |    | NLC | 16 |
| 232  |    | NLC | 16 |
| 233  |   | NLC | 16 |
| 234  |  | NLC | 16 |
| 235  |  | NLC | 16 |
| 236  |  | NLC | 16 |
| 237  |  | NLC | 16 |

# Supporting Information

|      |                                      |     |    |
|------|--------------------------------------|-----|----|
| 238  |                                      | NLC | 16 |
|      |                                      |     |    |
| 239  | R = OC <sub>6</sub> H <sub>13</sub>  | LC  | 16 |
| 240* | R = OC <sub>7</sub> H <sub>15</sub>  | LC  | 16 |
| 241  | R = OC <sub>8</sub> H <sub>17</sub>  | LC  | 16 |
| 242* | R = OC <sub>9</sub> H <sub>19</sub>  | LC  | 16 |
| 243* | R = OC <sub>10</sub> H <sub>21</sub> | LC  | 16 |
|      |                                      |     |    |
| 244  | R = OC <sub>6</sub> H <sub>13</sub>  | LC  | 16 |
| 245  | R = OC <sub>7</sub> H <sub>15</sub>  | LC  | 16 |
| 246  | R = OC <sub>8</sub> H <sub>17</sub>  | LC  | 16 |
| 247  | R = OC <sub>9</sub> H <sub>19</sub>  | LC  | 16 |
| 248  |                                      | LC  | 16 |
| 249  |                                      | NLC | 16 |
| 250  |                                      | NLC | 16 |
| 251  |                                      | LC  | 16 |

# Supporting Information

|      |                                                                                          |     |    |
|------|------------------------------------------------------------------------------------------|-----|----|
| 252  |                                                                                          | LC  | 16 |
| 253  |                                                                                          | LC  | 16 |
| 254  |                                                                                          | NLC | 16 |
|      |                                                                                          |     |    |
| 255  | R = OC <sub>12</sub> H <sub>25</sub> ; R <sub>1</sub> = OC <sub>8</sub> H <sub>17</sub>  | LC  | 16 |
| 256  | R = OC <sub>12</sub> H <sub>25</sub> ; R <sub>1</sub> = OC <sub>9</sub> H <sub>19</sub>  | LC  | 16 |
| 257  | R = OC <sub>12</sub> H <sub>25</sub> ; R <sub>1</sub> = OC <sub>10</sub> H <sub>21</sub> | LC  | 16 |
| 258  | R = OC <sub>12</sub> H <sub>25</sub> ; R <sub>1</sub> = OC <sub>11</sub> H <sub>23</sub> | LC  | 16 |
| 259  | R = OC <sub>12</sub> H <sub>25</sub> ; R <sub>1</sub> = OC <sub>12</sub> H <sub>25</sub> | LC  | 16 |
| 260  | R = OC <sub>12</sub> H <sub>25</sub> ; R <sub>1</sub> = OC <sub>13</sub> H <sub>27</sub> | LC  | 16 |
| 261  | R = OC <sub>12</sub> H <sub>25</sub> ; R <sub>1</sub> = OC <sub>14</sub> H <sub>29</sub> | LC  | 16 |
| 262  | R = OC <sub>10</sub> H <sub>21</sub> ; R <sub>1</sub> = OC <sub>8</sub> H <sub>17</sub>  | LC  | 16 |
| 263  | R = OC <sub>10</sub> H <sub>21</sub> ; R <sub>1</sub> = OC <sub>9</sub> H <sub>19</sub>  | LC  | 16 |
| 264  | R = OC <sub>10</sub> H <sub>21</sub> ; R <sub>1</sub> = OC <sub>10</sub> H <sub>21</sub> | LC  | 16 |
|      |                                                                                          |     |    |
| 265  | R = OC <sub>8</sub> H <sub>17</sub>                                                      | NLC | 17 |
| 266  | R = C <sub>10</sub> H <sub>21</sub>                                                      | NLC | 17 |
| 267* | R = C <sub>11</sub> H <sub>23</sub>                                                      | NLC | 17 |
| 268  | R = C <sub>12</sub> H <sub>25</sub>                                                      | LC  | 17 |
| 269  | R = C <sub>13</sub> H <sub>27</sub>                                                      | LC  | 17 |
|      |                                                                                          |     |    |
| 270  | R = OC <sub>8</sub> H <sub>17</sub>                                                      | NLC | 17 |
| 271  | R = C <sub>10</sub> H <sub>21</sub>                                                      | NLC | 17 |

# Supporting Information

|      |                                                                                      |     |    |
|------|--------------------------------------------------------------------------------------|-----|----|
| 272  | $R = C_{11}H_{23}$                                                                   | NLC | 17 |
| 273* | $R = C_{12}H_{25}$                                                                   | NLC | 17 |
|      | 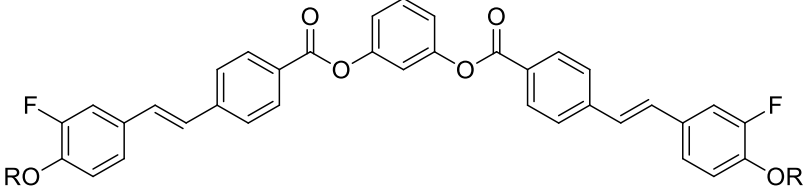   |     |    |
| 274  | $R = OC_8H_{17}$                                                                     | LC  | 17 |
| 275  | $R = C_{10}H_{21}$                                                                   | LC  | 17 |
| 276  | $R = C_{11}H_{23}$                                                                   | LC  | 17 |
| 277  | $R = C_{12}H_{25}$                                                                   | LC  | 17 |
| 278  | $R = C_{13}H_{27}$                                                                   | LC  | 17 |
|      |    |     |    |
| 279  | $R = OC_8H_{17}$                                                                     | LC  | 17 |
| 280  | $R = C_{10}H_{21}$                                                                   | LC  | 17 |
| 281  | $R = C_{11}H_{23}$                                                                   | LC  | 17 |
| 282  | $R = C_{12}H_{25}$                                                                   | LC  | 17 |
| 283* | $R = C_{13}H_{27}$                                                                   | LC  | 17 |
|      |  |     |    |
| 284  | $R = C_6H_{13}$                                                                      | NLC | 18 |
| 285* | $R = C_7H_{15}$                                                                      | LC  | 18 |
| 286* | $R = C_8H_{17}$                                                                      | LC  | 18 |
| 287  | $R = C_9H_{19}$                                                                      | LC  | 18 |
| 288* | $R = C_{10}H_{21}$                                                                   | LC  | 18 |
| 289  | $R = C_{11}H_{23}$                                                                   | LC  | 18 |
| 290  | $R = C_{12}H_{25}$                                                                   | LC  | 18 |
| 291  | $R = C_{13}H_{27}$                                                                   | LC  | 18 |
| 292* | $R = C_{14}H_{29}$                                                                   | LC  | 18 |
| 293* | $R = C_{16}H_{33}$                                                                   | LC  | 18 |
| 294  | $R = C_{18}H_{37}$                                                                   | LC  | 18 |

\* Compounds used in prediction set

## Molecular descriptors: Basic terms

The terminology used in the field of molecular descriptors is well described by Balaban and Ivanciuc<sup>19</sup>:

“Chemical formulas may be viewed as graphs that is as non-empty sets  $V$  and  $E$  of elements. Elements  $V$  are called vertices and symbolize atoms. Elements  $E$  are called edges; they are binary relations between elements  $V$ , i.e. unordered pairs, and they symbolize covalent bonds between atoms. Unless otherwise stated, hydrogen atoms will be ignored as organic chemists usually do when they write a benzene ring as a hexagon; such a hydrogen-depleted graph includes only non-hydrogen atoms. Two vertices connected by an edge are called adjacent, and the graph can be uniquely described by its adjacent matrix  $\mathbf{A}$ . This matrix has elements  $a_{ij}$  equal to 1 for adjacent vertices  $i$  and  $j$ , and zero otherwise. It was initially called the Hückel matrix. A path is a succession of non-repeating edges such that there is no break between edges. Walks can have repeating edges. Chemical graphs are connected graphs, as there is at least one path from any vertex to any other vertex of the graph. The (topological) distance  $d_{ij}$  between two vertices  $i$  and  $j$  is the number of edges along the shortest path between these vertices. The graph is also uniquely determined by its distance matrix  $\mathbf{D}$ , whose elements are distances  $d_{ij}$ .”

## The LC equations of created 2D-MARS (Eq. (S1)) and 2&amp;3D-MARS (Eq. (S2)) models:

$$\begin{aligned}
 2D\text{-MARS} (LC) = & 1.13 - 9.71 \cdot B_1 + 1.84 \cdot 10^{-2} \cdot B_2 - 1.63 \cdot 10^{-3} \cdot B_3 \cdot B_4 - 8.43 \cdot \\
 & 10^{-4} \cdot B_5 \cdot B_3 \cdot B_6 + 3.34 \cdot 10^{-3} \cdot B_7 \cdot B_3 \cdot B_6 - 2.18 \cdot 10^{-3} \cdot B_8 \cdot B_3 \cdot B_6 - 3.11 \cdot 10^{-2} \cdot \\
 & B_9 \cdot B_3 \cdot B_6 + 3.21 \cdot B_9 \cdot B_{10} \cdot B_3 \cdot B_6 + 2.94 \cdot 10^{-1} \cdot B_9 \cdot B_{11} \cdot B_3 \cdot B_6 - 5.68 \cdot 10^{-2} \cdot B_{12} \cdot \\
 & B_3 \cdot B_6 + 3.00 \cdot 10^{-4} \cdot B_8 \cdot B_{13} \cdot B_3 \cdot B_6 - 4.57 \cdot 10^{-4} \cdot B_8 \cdot B_{14} \cdot B_3 \cdot B_6 - 8.12 \cdot 10^{-1} \cdot \\
 & B_9 \cdot B_{15} \cdot B_3 \cdot B_6 + 1.75 \cdot 10^{-3} \cdot B_{16} \cdot B_3 \cdot B_4 + 9.24 \cdot 10^{-3} \cdot B_{17} \cdot B_3 \cdot B_4 + 4.37 \cdot 10^{-4} \cdot \\
 & B_{18} \cdot B_{12} \cdot B_3 \cdot B_6 + 1.26 \cdot 10^{-4} \cdot B_{19} \cdot B_{12} \cdot B_3 \cdot B_6 - 2.43 \cdot B_{20} \cdot B_{21} - 2.87 \cdot 10^{-1} \cdot B_{22} \cdot \\
 & B_9 \cdot B_3 \cdot B_6 - 5.58 \cdot 10^{-5} \cdot B_{23} \cdot B_9 \cdot B_3 \cdot B_6 + 3.51 \cdot B_{24} \cdot B_3 \cdot B_6 + 1.16 \cdot 10^1 \cdot B_{25} \cdot B_3 \cdot \\
 & B_6 - 3.10 \cdot B_{25} \cdot B_{26} \cdot B_3 \cdot B_6 + 6.15 \cdot 10^{-2} \cdot B_9 \cdot B_{27} \cdot B_3 \cdot B_6
 \end{aligned} \tag{S1}$$

$$\begin{aligned}
 2\&3D\text{-MARS} (LC) = & 9.02 \cdot 10^{-2} - 5.69 \cdot 10^1 \cdot B_1 + 8.80 \cdot B_2 - 1.81 \cdot 10^{-3} \cdot B_3 \cdot B_4 - \\
 & 7.83 \cdot 10^{-2} \cdot B_3 \cdot B_5 - 6.83 \cdot 10^{-1} \cdot B_3 \cdot B_6 - 3.16 \cdot 10^{-2} \cdot B_3 \cdot B_7 + 1.26 \cdot 10^{-1} \cdot B_3 \cdot B_8 + \\
 & 8.33 \cdot 10^{-2} \cdot B_3 \cdot B_9 - 1.64 \cdot B_{10} - 6.00 \cdot B_{11} \cdot B_{12} - 7.08 \cdot 10^{-1} \cdot B_{11} \cdot B_{13} + 2.44 \cdot 10^{-1} \cdot \\
 & B_{13} - 6.09 \cdot 10^{-2} \cdot B_2 \cdot B_{15} - 3.19 \cdot 10^{-3} \cdot B_2 \cdot B_{16} - 8.74 \cdot 10^1 \cdot B_{17} \cdot B_{18} - 7.65 \cdot 10^{-2} \cdot \\
 & B_{19} \cdot B_{18} - 1.03 \cdot B_{20} \cdot B_3 - 2.33 \cdot 10^{-5} \cdot B_{21} \cdot B_3 - 5.30 \cdot 10^1 \cdot B_{11} \cdot B_{22} - 1.94 \cdot 10^{-2} \cdot \\
 & B_{23} \cdot B_3 + 2.23 \cdot 10^{-2} \cdot B_{24} - 3.75 \cdot 10^{-1} \cdot B_{25} \cdot B_3 + 1.12 \cdot 10^{-1} \cdot B_{26} \cdot B_1
 \end{aligned} \tag{S2}$$



**Table S2. List of descriptors used in the MARS models with short description**

| Group                                 | Label        | Short description                                                                                                |
|---------------------------------------|--------------|------------------------------------------------------------------------------------------------------------------|
| <i>2D descriptors</i>                 |              |                                                                                                                  |
| Path Count                            | MPC10        | Molecular path count of order 10                                                                                 |
| Wiener Numbers                        | WPOL         | Wiener polarity number                                                                                           |
| BCUT                                  | BCUTp-1h     | nlow highest polarizability weighted BCUTS                                                                       |
| Chi Path                              | VP-4         | Valence path, order 4                                                                                            |
|                                       | VP-6         | Valence path, order 6                                                                                            |
|                                       | AVP-0        | Average valence path, order 0                                                                                    |
| Chi Chain                             | SCH-7        | Simple chain, order 7                                                                                            |
| Chi Path Cluster                      | VPC-4        | Valence path cluster, order 4                                                                                    |
|                                       | VC-5         | Valence cluster, order 5                                                                                         |
| Detour Matrix                         | VE1_Dt       | Coefficient sum of the last eigenvector from detour matrix                                                       |
|                                       | VE2_Dt       | Average coefficient sum of the last eigenvector from detour matrix                                               |
|                                       | VE3_Dt       | Logarithmic coefficient sum of the last eigenvector from detour matrix                                           |
| Molecular distance edge               | MDEC-12      | Molecular distance edge between all primary and secondary carbons                                                |
| Barysz Matrix                         | VE3_Dzv      | Logarithmic coefficient sum of the last eigenvector from Barysz matrix weighted by van der Waals volumes         |
|                                       | VE3_Dzs      | Logarithmic coefficient sum of the last eigenvector from Barysz matrix weighted by I-state                       |
|                                       | VE3_Dze      | Logarithmic coefficient sum of the last eigenvector from Barysz matrix weighted by Sanderson electronegativities |
| Information Content                   | SpAbs_Dzp    | Graph energy from Barysz matrix weighted by polarizabilities                                                     |
|                                       | IC2          | Information content index (neighbourhood symmetry of 2-order)                                                    |
|                                       | MIC5         | Modified information content index (neighbourhood symmetry of 5-order)                                           |
| Molecular linear free energy relation | MLFER_S      | Combined dipolarity/polarizability                                                                               |
|                                       | MLFER_L      | Solute gas-hexadecane partition coefficient                                                                      |
|                                       | MLFER_BO     | Overall or summation solute hydrogen bond basicity                                                               |
| Extended Topochemical Atom            | ETA_EtaP_F   | Functionality index EtaF relative to molecular size                                                              |
|                                       | ETA_Eta_R    | Composite index Eta for reference alkane                                                                         |
| <i>3D descriptors</i>                 |              |                                                                                                                  |
| Petitjean Shape Index                 | geomDiameter | Geometrical diameter (maximum geometric eccentricity)                                                            |
| Charged partial surface area          | WNSA-2       | Partial negative surface area * total negative charge on the molecule * total molecular surface area / 1000      |
|                                       | RPCS         | Relative positive charge surface area = most positive surface area * relative positive charge                    |
| WHIM                                  | E3s          | 3rd component accessibility directional WHIM index weighted by relative I-state                                  |
|                                       | P2m          | 2nd component shape directional WHIM index weighted by relative mass                                             |

**Table S3. Short description of descriptors selected using feature selection and genetic algorithms**

| Label                 | Short description                                                                           |
|-----------------------|---------------------------------------------------------------------------------------------|
| <i>2D descriptors</i> |                                                                                             |
| SM1_Dzi               | Spectral moment of order 1 from Barysz matrix weighted by first ionization potential        |
| SM1_Dzs               | Spectral moment of order 1 from Barysz matrix weighted by I-state                           |
| SM1_Dzp               | Spectral moment of order 1 from Barysz matrix weighted by polarizabilities                  |
| EE_Dzi                | Estrada-like index from Barysz matrix weighted by first ionization potential ( $\ln(1+x)$ ) |
| EE_Dzm                | Estrada-like index from Barysz matrix weighted by mass ( $\ln(1+x)$ )                       |
| EE_Dzv                | Estrada-like index from Barysz matrix weighted by van der Waals volumes ( $\ln(1+x)$ )      |
| BCUTp-1h              | nlow highest polarizability weighted BCUTS                                                  |
| BCUTc-1h              | nlow highest partial charge weighted BCUTS                                                  |
| C1SP3                 | Singly bound carbon bound to one other carbon                                               |
| C3SP2                 | Doubly bound carbon bound to three other carbons                                            |
| SCH-6                 | Simple chain, order 6                                                                       |
| SCH-7                 | Simple chain, order 7                                                                       |
| VCH-6                 | Valence chain, order 6                                                                      |
| VCH-7                 | Valence chain, order 7                                                                      |
| VC-3                  | Valence cluster, order 3                                                                    |
| VC-5                  | Valence cluster, order 5                                                                    |
| VPC-4                 | Valence path cluster, order 4                                                               |
| VPC-5                 | Valence path cluster, order 5                                                               |
| VPC-6                 | Valence path cluster, order 6                                                               |
| piPC5                 | Conventional bond order ID number of order 5 ( $\ln(1+x)$ )                                 |
| piPC7                 | Conventional bond order ID number of order 7 ( $\ln(1+x)$ )                                 |
| TpiPC                 | Total conventional bond order (up to order 10) ( $\ln(1+x)$ )                               |
| MPC8                  | Molecular path count of order 8                                                             |
| ETA_Beta              | A measure of electronic features of the molecule                                            |
| ETA_dAlpha_B          | A measure of count of hydrogen bond acceptor atoms and/or polar surface area                |
| ETA_dPsi_A            | A measure of hydrogen bonding propensity of the molecules                                   |
| ETA_BetaP             | A measure of electronic features of the molecule relative to molecular size                 |
| ETA_Beta_ns_d         | A measure of lone electrons entering into resonance                                         |
| MDEC-13               | Molecular distance edge between all primary and tertiary carbons                            |
| MLFER_E               | Excessive molar refraction                                                                  |
| GGI6                  | Topological charge index of order 6                                                         |
| GGI9                  | Topological charge index of order 9                                                         |
| JGI9                  | Mean topological charge index of order 9                                                    |
| SIC3                  | Structural information content index (neighbourhood symmetry of 3-order)                    |
| Mare                  | Mean atomic Allred-Rochow electronegativities (scaled on carbon atom)                       |
| VE3_D                 | Logarithmic coefficient sum of the last eigenvector from topological distance matrix        |
| VR2_Dzs               | Normalized Randic-like eigenvector-based index from Barysz matrix weighted by I-state       |
| <i>3D descriptors</i> |                                                                                             |
| Dp                    | D total accessibility index / weighted by relative polarizabilities                         |
| L1s                   | 1st component size directional WHIM index weighted by relative I-state                      |

**The SKNN and CPNN optimization results. An example of bubble plot.**

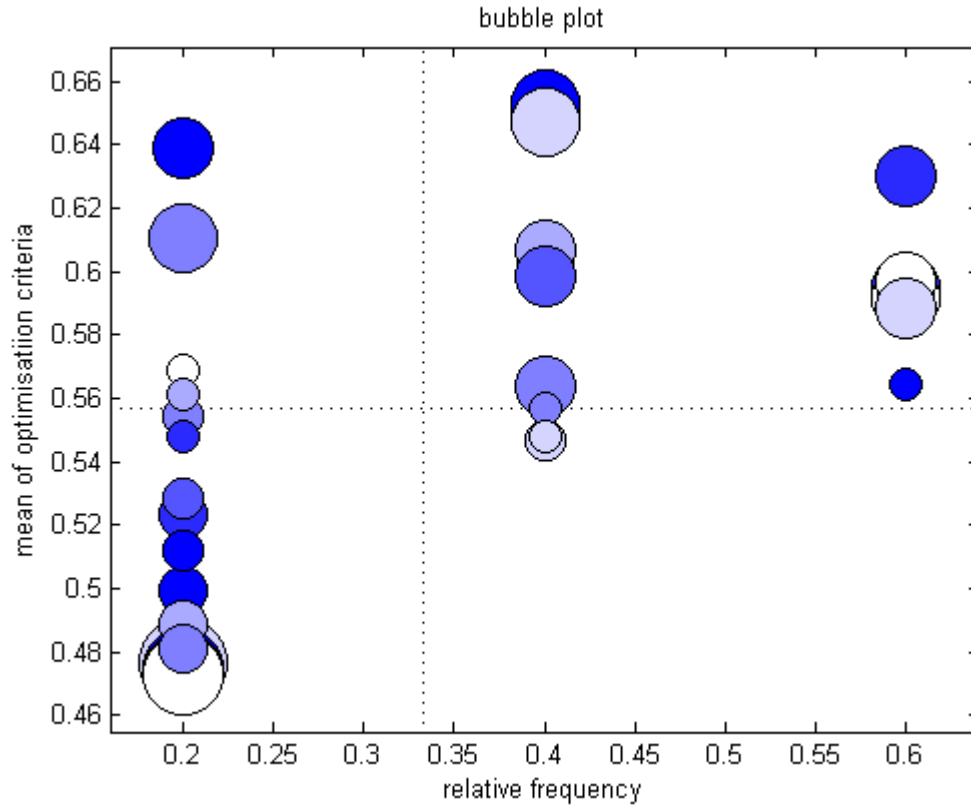

**Figure S1.** Plot of relative frequency of selection and mean value of optimization criteria used for the selection of the 2D-FLS-SKNN architecture and training parameters. The dimension of each bubble is proportional to the network size, the colour of the bubbles is proportional to the number of epochs; the darker colour means the higher number of epochs. The dotted line represents the overall means of frequencies and fitness function.

## Supporting Information

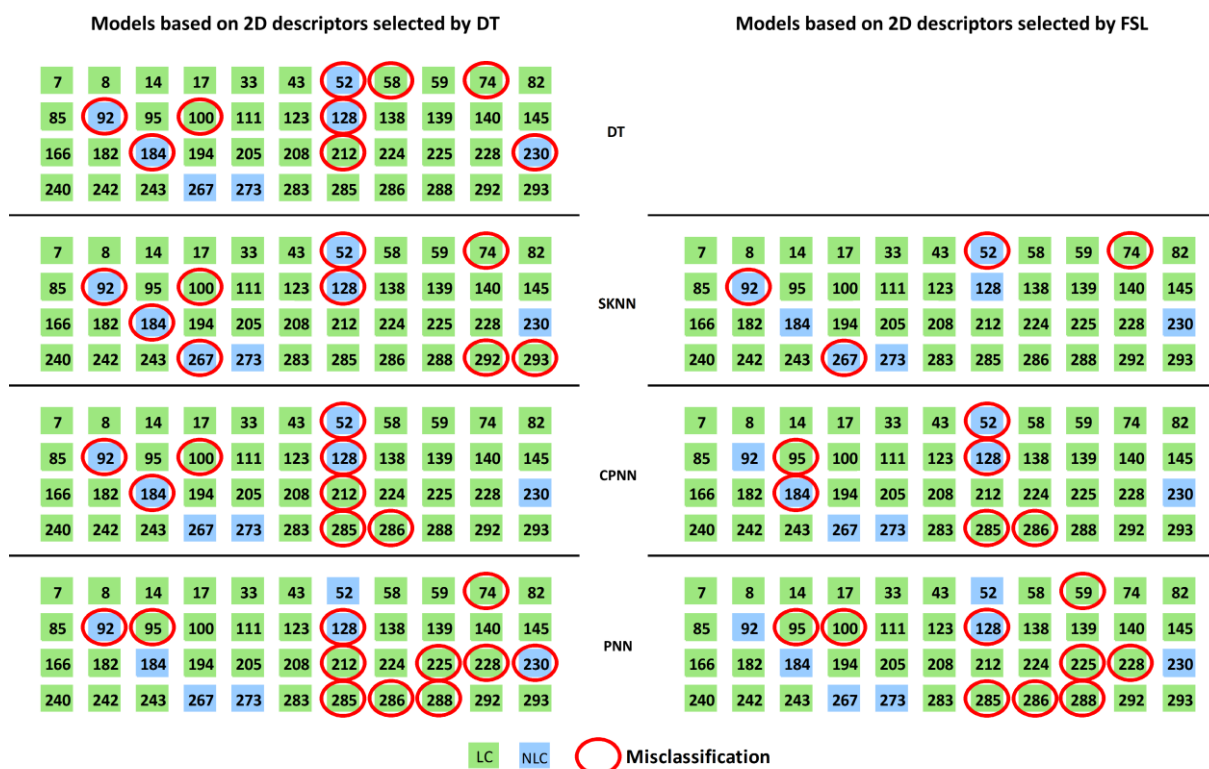

**Figure S2.** The prediction of LCs by DT model and ANN models, which are based on descriptors selected by DT and FSL

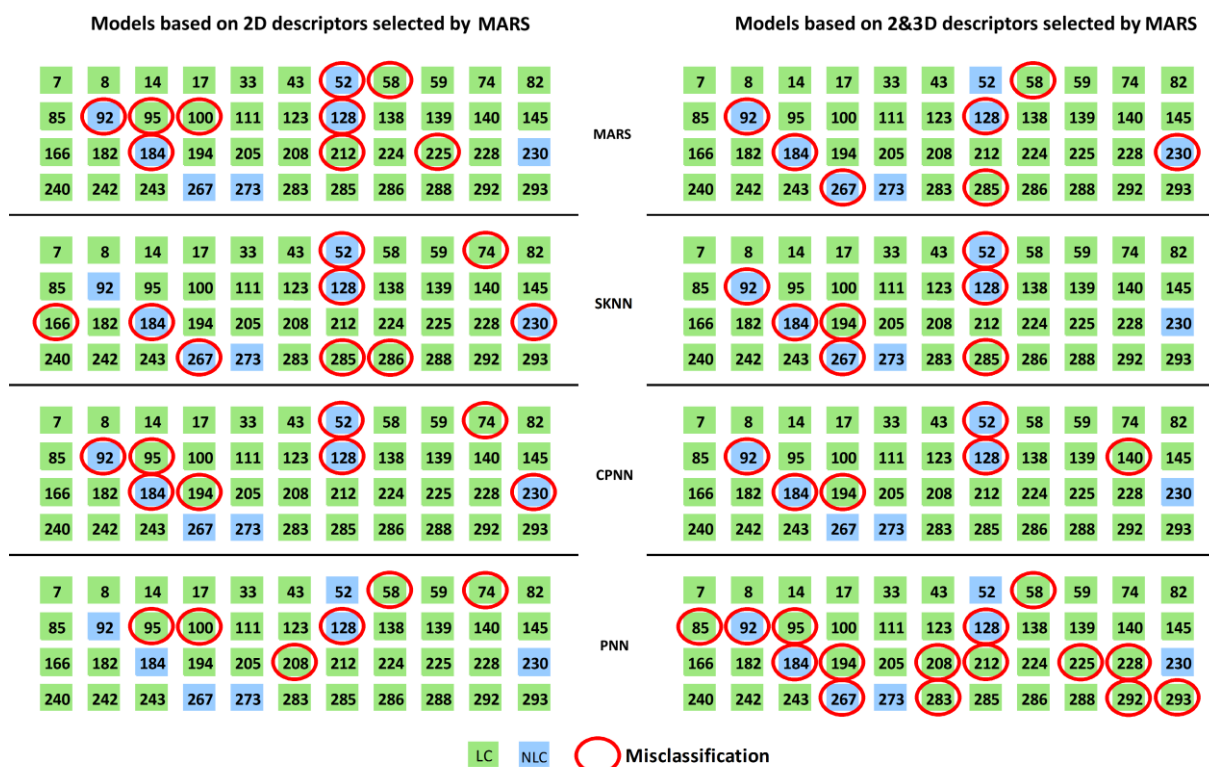

**Figure S3.** The prediction of LCs by MARS models and ANN models, which are based on descriptors selected by MARS

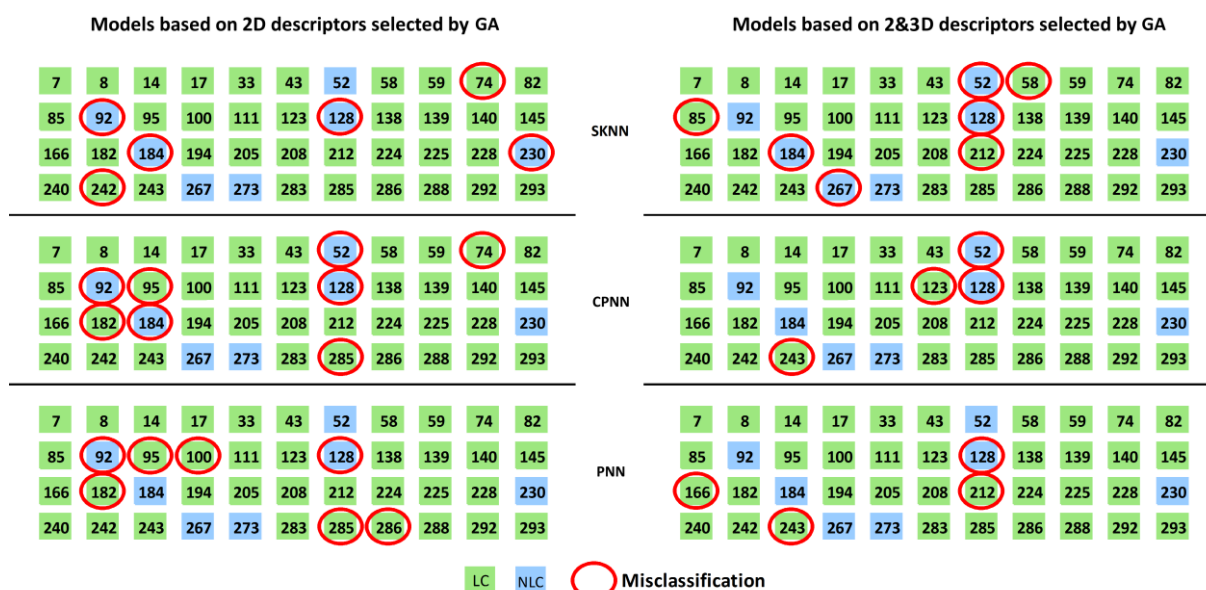

**Figure S4.** The prediction of LCs by ANN models based on descriptors selected by GAs

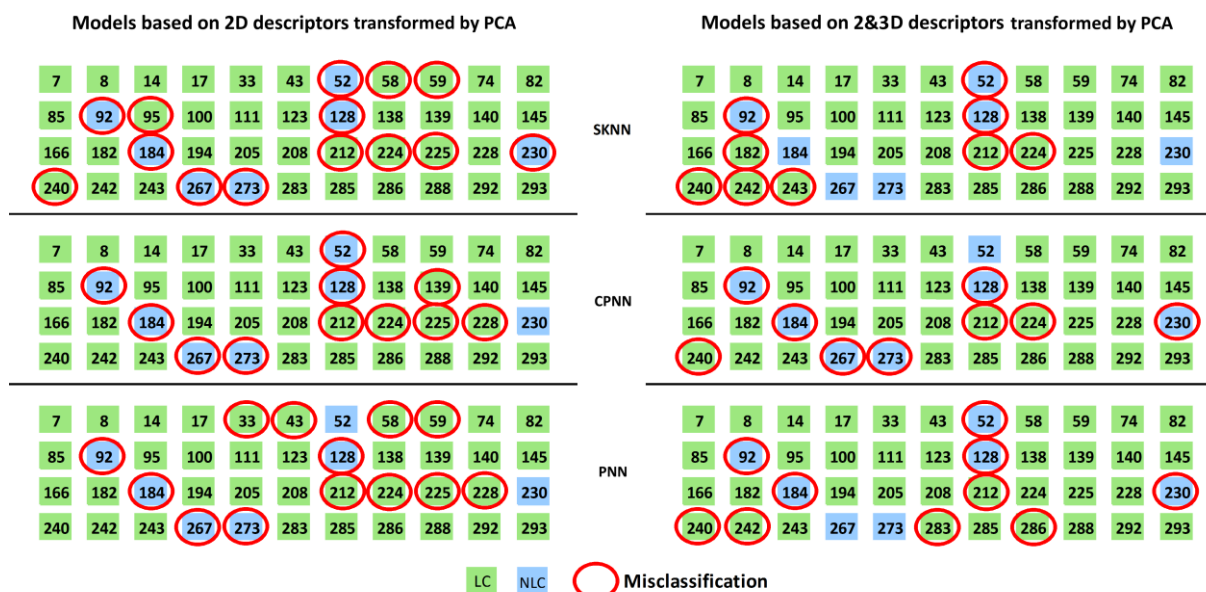

**Figure S5.** The prediction of LCs by ANN models based on descriptors selected by PCA

## Supporting Information

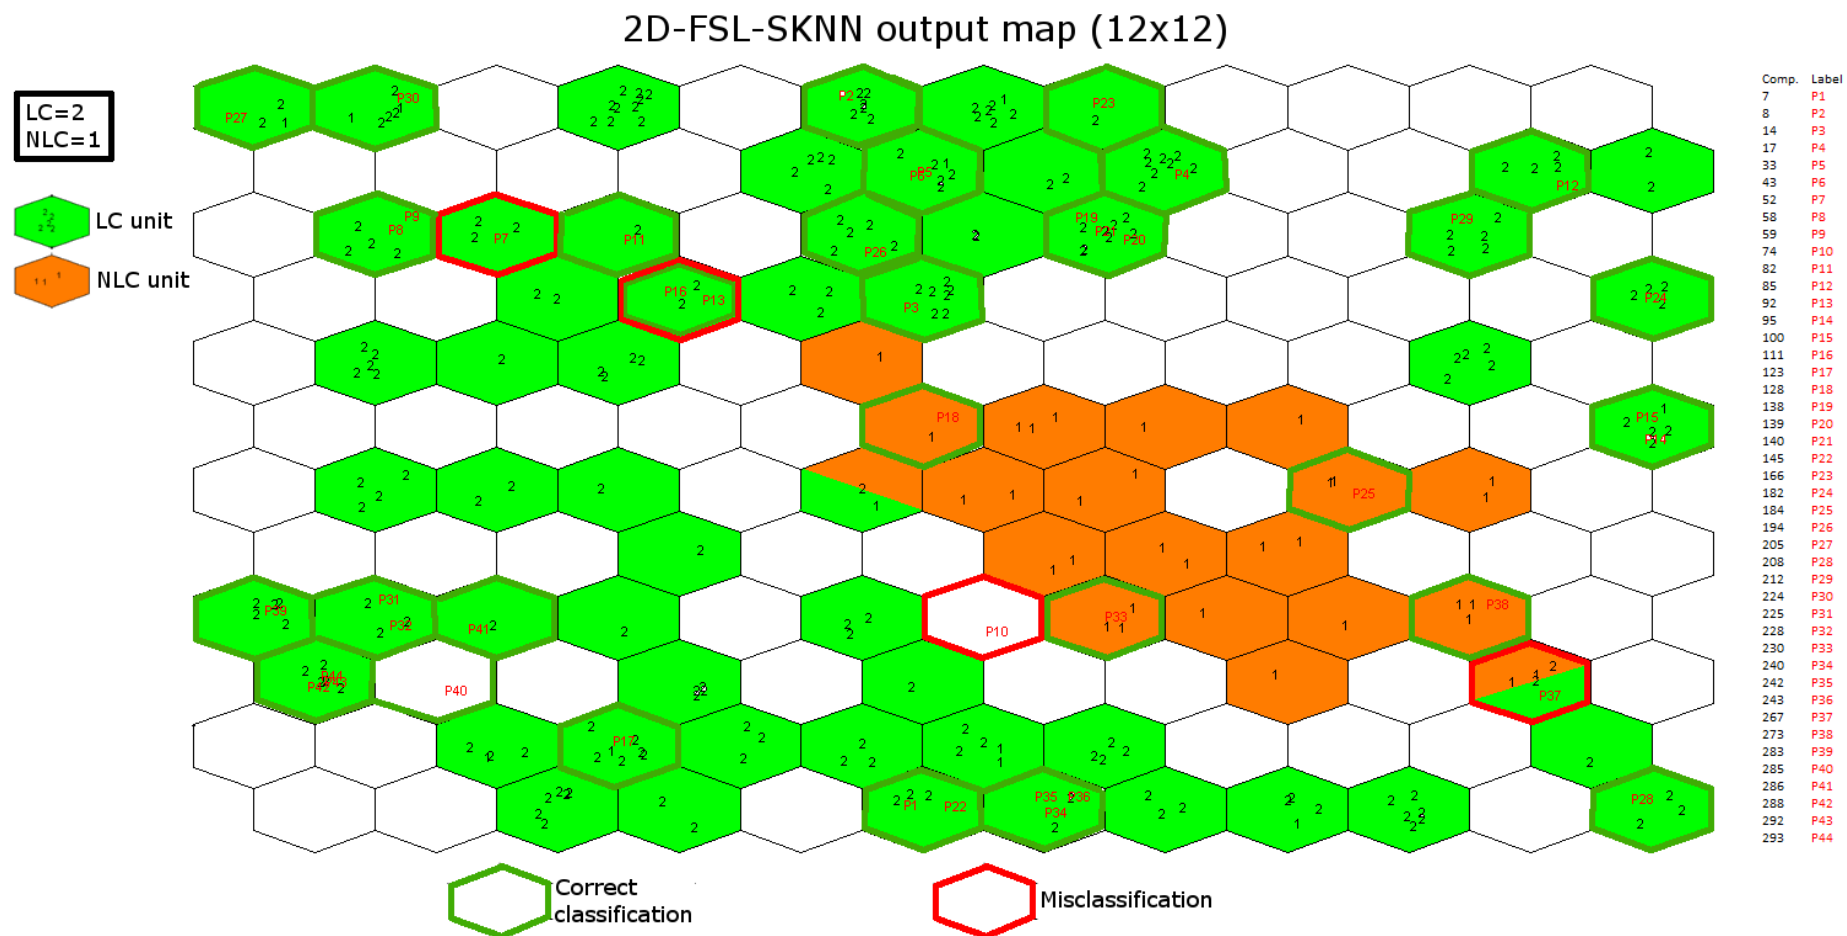

**Figure S6.** The 2D-FSL-SKNN output map (12x12) with the location of compounds used to test the model

## Supporting Information

**Table S4. The 2&3D-GA-PNN output probabilities**

| Compound   | Observed behavior | Probability of being LC ( $p_{LC}$ ) (%) | Classification |
|------------|-------------------|------------------------------------------|----------------|
| 7          | LC                | 86                                       | LC             |
| 8          | LC                | 86                                       | LC             |
| 14         | LC                | 82                                       | LC             |
| 17         | LC                | 100                                      | LC             |
| 33         | LC                | 85                                       | LC             |
| 43         | LC                | 62                                       | LC             |
| 52         | NLC               | 10                                       | NLC            |
| 58         | LC                | 50                                       | LC             |
| 59         | LC                | 70                                       | LC             |
| 74         | LC                | 100                                      | LC             |
| 82         | LC                | 77                                       | LC             |
| 85         | LC                | 65                                       | LC             |
| 92         | NLC               | 18                                       | NLC            |
| 95         | LC                | 99                                       | LC             |
| 100        | LC                | 56                                       | LC             |
| 111        | LC                | 77                                       | LC             |
| 123        | LC                | 55                                       | LC             |
| <b>128</b> | <b>NLC</b>        | <b>81</b>                                | <b>LC</b>      |
| 138        | LC                | 99                                       | LC             |
| 139        | LC                | 99                                       | LC             |
| 140        | LC                | 99                                       | LC             |
| 145        | LC                | 83                                       | LC             |
| <b>166</b> | <b>LC</b>         | <b>47</b>                                | <b>NLC</b>     |
| 182        | LC                | 71                                       | LC             |
| 184        | NLC               | 27                                       | NLC            |
| 194        | LC                | 95                                       | LC             |
| 205        | LC                | 77                                       | LC             |
| 208        | LC                | 82                                       | LC             |
| <b>212</b> | <b>LC</b>         | <b>19</b>                                | <b>NLC</b>     |
| 224        | LC                | 51                                       | LC             |
| 225        | LC                | 62                                       | LC             |
| 228        | LC                | 76                                       | LC             |
| 230        | NLC               | 37                                       | NLC            |
| 240        | LC                | 68                                       | LC             |
| 242        | LC                | 57                                       | LC             |
| <b>243</b> | <b>LC</b>         | <b>6</b>                                 | <b>NLC</b>     |
| 267        | NLC               | 20                                       | NLC            |
| 273        | NLC               | 5                                        | NLC            |
| 283        | LC                | 92                                       | LC             |
| 285        | LC                | 57                                       | LC             |
| 286        | LC                | 77                                       | LC             |
| 288        | LC                | 82                                       | LC             |
| 292        | LC                | 91                                       | LC             |
| 293        | LC                | 91                                       | LC             |

## References

- (1) Srinivasan, M. V.; Kannan, P.; Roy, A. Photo and electrically switchable B7 mesophase exhibiting asymmetric bent-core liquid crystals. *New J. Chem.* **2013**, 37, 1584–1590.
- (2) Nagaveni, N. G.; Roy, A.; Prasad, V. Achiral bent-core azo compounds: effect of different types of linkage groups and their direction of linking on liquid crystalline properties. *J. Mater. Chem.* **2012**, 22, 8948–8959.
- (3) Vijay Srinivasan, M.; Kannan, P.; Roy, A. Investigations on photo and electrically switchable asymmetric bent-core liquid crystals. *J. Mater. Sci.* **2013**, 48, 2433–2446.
- (4) Alaasar, M.; Prehm, M.; Brautzsch, M.; Tschierske, C. 4-Methylresorcinol based bent-core liquid crystals with azobenzene wings – a new class of compounds with dark conglomerate phases. *J. Mater. Chem. C* **2014**, 2, 5487–5501.
- (5) Lutfor, M. R.; Hegde, G.; Kumar, S.; Tschierske, C.; Chigrinov, V. G. Synthesis and characterization of bent-shaped azobenzene monomers: Guest-host effects in liquid crystals with azo dyes for optical image storage devices. *Opt. Mater.* **2009**, 32, 176–183.
- (6) Alaasar, M.; Prehm, M.; Tschierske, C. Influence of halogen substituent on the mesomorphic properties of five-ring banana-shaped molecules with azobenzene wings. *Liq. Cryst.* **2013**, 40, 656–668.
- (7) Alaasar, M.; Prehm, M.; Brautzsch, M.; Tschierske, C. Dark conglomerate phases of azobenzene derived bent-core mesogens – relationships between the molecular structure and mirror symmetry breaking in soft matter. *Soft Matter* **2014**, 10, 7285–7296.
- (8) Alaasar, M.; Prehm, M.; May, K.; Eremin, A.; Tschierske, C. 4-Cyanoresorcinol-Based Bent-Core Mesogens with Azobenzene Wings: Emergence of Sterically Stabilized Polar Order in Liquid Crystalline Phases. *Adv. Funct. Mater.* **2014**, 24, 1703–1717.
- (9) Alaasar, M.; Prehm, M.; Tschierske, C. A new room temperature dark conglomerate mesophase formed by bent-core molecules combining 4-iodoresorcinol with azobenzene units. *Chem. Commun.* **2013**, 49, 11062–11064.
- (10) Nagaveni, N. G.; Raghuvanshi, P.; Roy, A.; Prasad, V. Azo-functionalised achiral bent-core liquid crystalline materials: effect of presence of –N=N– linkage at different locations in the molecular architecture. *Liq. Cryst.* **2013**, 40, 1238–1254.
- (11) Nagaveni, N. G.; Prasad, V.; Roy, A. Azo functionalised achiral bent-core liquid crystals: observation of photo-induced effects in B7 and B2 mesophases. *Liq. Cryst.* **2013**, 40, 1405–1416.
- (12) Prasad, V.; Kang, S.-W.; Qi, X.; Kumar, S. Photo-responsive and electrically switchable mesophases in a novel class of achiral bent-core azo compounds. *J. Mater. Chem.* **2004**, 14, 1495–1502.



## Supporting Information

- (13) Prasad, V.; Kang, S.-W.; Kumar, S. Novel examples of achiral bent-core azo compounds exhibiting B1 and anticlinic-antiferroelectric B2 mesophases. *J. Mater. Chem.* **2003**, *13*, 1259–1264.
- (14) Prasad, V.; Jákli, A. Achiral bent-core azo compounds: observation of photoinduced effects in an antiferroelectric tilted smectic mesophase. *Liq. Cryst.* **2004**, *31*, 473–479.
- (15) Alaasar, M.; Prehm, M.; Tschierske, C. New azobenzene containing bent-core liquid crystals based on disubstituted resorcinol. *Liq. Cryst.* **2014**, *41*, 126–136.
- (16) Pelzl, G.; Diele, S.; Weissflog, W. Banana-shaped compounds - a new field of liquid crystals. *Adv. Mater.* **1999**, *11*, 707–724.
- (17) Pyc, P.; Mieczkowski, J.; Pocięcha, D.; Gorecka, E.; Donnio, B.; Guillon, D. Bent-core molecules with lateral halogen atoms forming tilted, synclinic and anticlinic, lamellar phases. *J. Mater. Chem.* **2004**, *14*, 2374–2379.
- (18) Umadevi, S.; Jákli, A.; Sadashiva, B. K. Odd-even effects in bent-core compounds containing terminal n-alkyl carboxylate groups. *Soft Matter* **2006**, *2*, 875–885.
- (19) Balaban, A. T.; Ivanciuc, O. Historical development of topological indices. In *Topological Indices and Related Descriptors in QSAR and QSPR*; Devillers, J., Balaban, A. T., Eds.; Gordon and Breach Science Publishers, Inc.: Netherlands, 1999; pp 21–57.
